# Supplementary material
Source: PubMed Central journal article supplement (PMC7447520)
Supplement: awaa188_supplementary_data.pdf [file awaa188_supplementary_data.pdf]

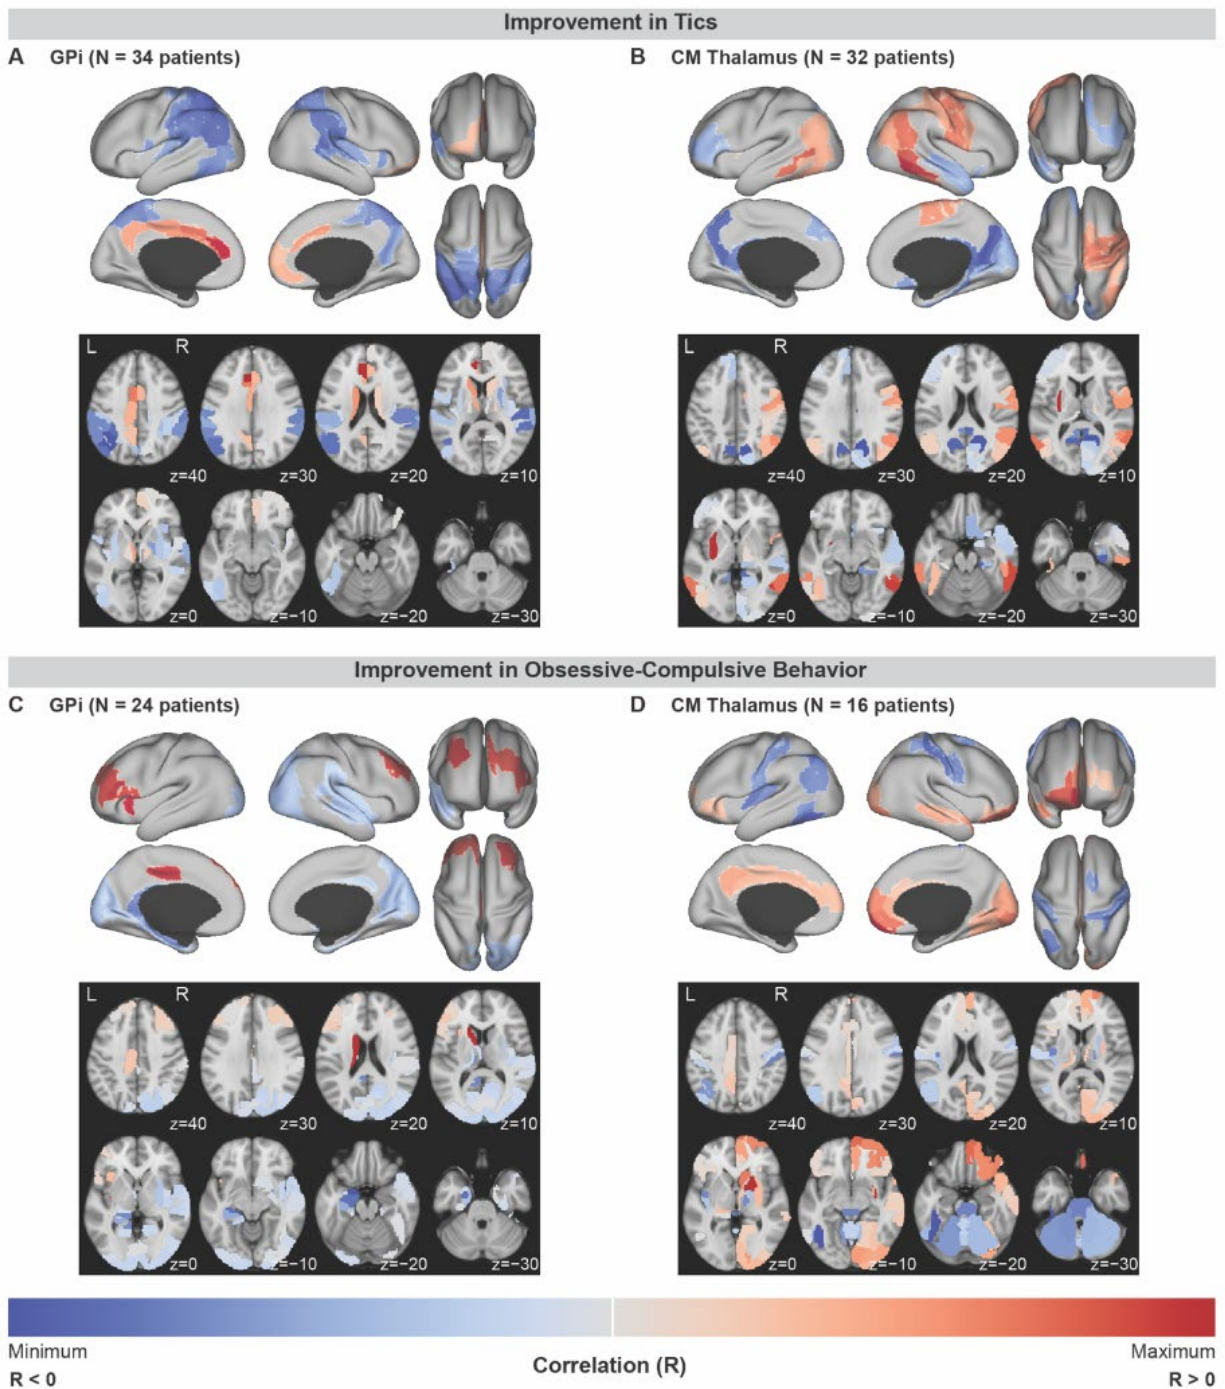

**Supplementary Fig. 1. Top regions correlated with symptom improvement used for “reverse” tractography. Top row – improvement in tics: (A)** Across patients implanted in GPI, the top positively correlated regions included cingulate cortex, orbitofrontal cortex, and dorsal caudate; the top negatively correlated regions included inferior and superior parietal lobule, primary motor cortex, primary sensory cortex, and putamen. **(B)** Across patients implanted in CM thalamus, the top positively correlated regions included dorsolateral putamen, parietal-temporal-occipital regions, supplementary motor area, primary motor cortex, and primary sensory cortex; the top negatively correlated regions were cingulate cortex, precuneus, and the parahippocampal gyrus. **Bottom row – improvement in obsessive-compulsive behavior: (C)** Across patients implanted in GPI, the top positively correlated regions included dorsolateral prefrontal cortex, dorsal caudate, and dorsal cingulate cortex; the top negatively correlated regions included amygdala, posterior cingulate cortex, insula, and occipital cortex. **(D)** Across patients implanted in CM thalamus, the top positively correlated regions included ventral caudate and putamen, medial and lateral orbitofrontal cortex, anterior and dorsal cingulate cortex, occipital cortex, and middle temporal gyrus; the top negatively correlated regions included fusiform gyrus, primary motor cortex, and primary sensory cortex.

**Table 1: Top regions correlated with percent change in YGTSS Total Score following DBS of globus pallidus internus (N = 34 patients)**

Range of q-values (FDR-corrected p-values):  $q = 0.064-0.066$ .

| Rank | Parcel Number | Hemisphere | Parcellation Area                                    | F-score | R      |
|------|---------------|------------|------------------------------------------------------|---------|--------|
| 1    | 179           | Left       | Cingulate cortex – pregenual (BA32)                  | 10.139  | 0.491  |
| 2    | 183           | Left       | Cingulate cortex – caudodorsal BA24                  | 7.799   | 0.443  |
| 3    | 227           | Left       | Dorsal caudate                                       | 7.043   | 0.425  |
| 4    | 231           | Left       | Thalamus – medial prefrontal region                  | 6.551   | 0.412  |
| 5    | 177           | Left       | Cingulate cortex – rostroventral BA24                | 6.322   | 0.406  |
| 6    | 137           | Left       | Inferior parietal lobule – rostradorsal BA39         | 6.252   | -0.404 |
| 7    | 133           | Left       | Intraparietal area (BA7)                             | 6.180   | -0.402 |
| 8    | 185           | Left       | Cingulate cortex – caudal BA24                       | 6.068   | 0.399  |
| 9    | 184           | Right      | Cingulate cortex – caudodorsal BA24                  | 5.930   | 0.395  |
| 10   | 72            | Right      | Superior temporal gyrus (BA41/42)                    | 5.904   | -0.395 |
| 11   | 129           | Left       | Superior parietal lobule – lateral BA5               | 5.820   | -0.392 |
| 12   | 124           | Right      | Caudoposterior superior temporal sulcus              | 5.757   | -0.390 |
| 13   | 125           | Left       | Superior parietal lobule – rostral BA7               | 5.737   | -0.390 |
| 14   | 143           | Left       | Inferior parietal lobule – rostroventral BA39        | 5.735   | -0.390 |
| 15   | 180           | Right      | Cingulate cortex – pregenual (BA32)                  | 5.711   | 0.389  |
| 16   | 146           | Right      | Inferior parietal lobule – rostroventral BA40        | 5.516   | -0.383 |
| 17   | 141           | Left       | Inferior parietal lobule – caudal BA40               | 5.427   | -0.381 |
| 18   | 139           | Left       | Inferior parietal lobule – rostradorsal BA40         | 5.408   | -0.380 |
| 19   | 153           | Left       | Precuneus – BA31                                     | 5.398   | 0.380  |
| 20   | 142           | Right      | Inferior parietal lobule – caudal BA40               | 5.334   | -0.378 |
| 21   | 131           | Left       | Superior parietal lobule – postcentral BA7           | 5.235   | -0.375 |
| 22   | 222           | Right      | Globus pallidus                                      | 5.134   | -0.372 |
| 23   | 128           | Right      | Superior parietal lobule – caudal BA7                | 5.004   | -0.368 |
| 24   | 76            | Right      | Superior temporal gyrus – caudal BA22                | 4.982   | -0.367 |
| 25   | 148           | Right      | Precuneus – medial BA7                               | 4.967   | -0.367 |
| 26   | 145           | Left       | Inferior parietal lobule – rostroventral BA40        | 4.958   | -0.366 |
| 27   | 126           | Right      | Superior parietal lobule – rostral BA7               | 4.918   | -0.365 |
| 28   | 149           | Left       | Precuneus – medial BA5                               | 4.862   | -0.363 |
| 29   | 234           | Right      | Thalamus – premotor region                           | 4.702   | 0.358  |
| 30   | 130           | Right      | Superior parietal lobule – lateral BA5               | 4.692   | -0.358 |
| 31   | 150           | Right      | Precuneus – medial BA5                               | 4.671   | -0.357 |
| 32   | 228           | Right      | Dorsal caudate                                       | 4.647   | 0.356  |
| 33   | 147           | Left       | Precuneus – medial BA7                               | 4.582   | -0.354 |
| 34   | 42            | Right      | Orbitofrontal cortex – medial BA14                   | 4.556   | 0.353  |
| 35   | 71            | Left       | Superior temporal gyrus – BA41/42                    | 4.529   | -0.352 |
| 36   | 168           | Right      | Dorsal agranular insula                              | 4.506   | -0.351 |
| 37   | 107           | Left       | Fusiform gyrus – lateroventral BA37                  | 4.445   | -0.349 |
| 38   | 230           | Right      | Dorsolateral putamen                                 | 4.432   | -0.349 |
| 39   | 132           | Right      | Superior parietal lobule – postcentral BA7           | 4.423   | -0.348 |
| 40   | 159           | Left       | Postcentral gyrus – BA2                              | 4.369   | -0.347 |
| 41   | 134           | Right      | Superior parietal lobule – intraparietal BA7         | 4.337   | -0.345 |
| 42   | 161           | Left       | Postcentral gyrus – BA1/2/3 (trunk region)           | 4.312   | -0.345 |
| 43   | 91            | Left       | Inferior temporal gyrus – extreme lateroventral BA37 | 4.297   | -0.344 |
| 44   | 127           | Left       | Superior parietal lobule – caudal BA7                | 4.287   | -0.344 |
| 45   | 201           | Left       | Lateral occipital cortex – V5/MT+                    | 4.282   | -0.344 |
| 46   | 61            | Left       | Precentral gyrus – BA4 (tongue and larynx)           | 4.259   | -0.343 |
| 47   | 229           | Left       | Dorsolateral putamen                                 | 4.256   | -0.343 |
| 48   | 140           | Right      | Inferior parietal lobule – rostradorsal BA40         | 4.223   | -0.341 |
| 49   | 164           | Right      | Hypergranula insula                                  | 4.159   | -0.339 |
| 50   | 122           | Right      | Caudoposterior superior temporal sulcus              | 4.153   | -0.339 |
| 51   | 172           | Right      | Dorsal granular insula                               | 4.024   | -0.334 |
| 52   | 65            | Left       | Paracentral lobule – BA1/2/3 (lower limb region)     | 4.017   | -0.334 |
| 53   | 97            | Left       | Inferior temporal gyrus – ventrolateral BA37         | 3.989   | -0.333 |

|    |     |       |                                                  |       |        |
|----|-----|-------|--------------------------------------------------|-------|--------|
| 54 | 66  | Right | Paracentral lobule – BA1/2/3 (lower limb region) | 3.980 | -0.333 |
| 55 | 59  | Left  | Precentral gyrus – BA4 (trunk region)            | 3.887 | -0.329 |
| 56 | 245 | Left  | Thalamus – lateral prefrontal region             | 3.882 | 0.329  |
| 57 | 163 | Left  | Hypergranular insula                             | 3.873 | -0.329 |
| 58 | 44  | Right | Orbitofrontal cortex – orbital BA12/BA47         | 3.777 | 0.325  |
| 59 | 14  | Right | Superior frontal gyrus – medial BA10             | 3.738 | 0.323  |
| 60 | 57  | Left  | Precentral gyrus – BA4 (upper limb region)       | 3.730 | -0.323 |
| 61 | 74  | Right | Superior temporal gyrus – TE1.0 and TE1.2        | 3.729 | -0.323 |
| 62 | 28  | Right | Middle frontal gyrus – lateral BA10              | 3.721 | 0.323  |
| 63 | 152 | Right | Precuneus – dorsomedial parietooccipital sulcus  | 3.669 | -0.321 |
| 64 | 232 | Right | Thalamus – medial prefrontal region              | 3.626 | 0.319  |

**Table 2: Top regions correlated with percent change in YGTSS Total Score following bilateral DBS of centromedial thalamus (N = 32 patients)**

Range of q-values (FDR-corrected p-values): q = 0.289-0.292.

| Rank | Parcel Number | Hemisphere | Parcellation Area                                         | F-score | R      |
|------|---------------|------------|-----------------------------------------------------------|---------|--------|
| 1    | 229           | Left       | Dorsolateral putamen                                      | 3.756   | 0.334  |
| 2    | 98            | Right      | Inferior temporal gyrus – ventrolateral BA37              | 3.502   | 0.323  |
| 3    | 100           | Right      | Inferior temporal gyrus – caudolateral BA20               | 3.378   | 0.318  |
| 4    | 92            | Right      | Inferior temporal gyrus – extreme lateroventral BA37      | 3.363   | 0.317  |
| 5    | 152           | Right      | Precuneus – dorsomedial parietooccipital sulcus           | 3.040   | -0.303 |
| 6    | 86            | Right      | Middle temporal gyrus – dorsolateral BA37                 | 2.967   | 0.300  |
| 7    | 85            | Left       | Middle temporal gyrus – dorsolateral BA37                 | 2.912   | 0.297  |
| 8    | 147           | Left       | Precuneus – medial BA7                                    | 2.894   | -0.297 |
| 9    | 112           | Right      | Parahippocampal gyrus – caudal BA35/36                    | 2.891   | -0.296 |
| 10   | 151           | Left       | Precuneus – dorsomedial parietooccipital sulcus           | 2.848   | -0.294 |
| 11   | 182           | Right      | Cingulate cortex – ventral BA23                           | 2.762   | -0.290 |
| 12   | 99            | Left       | Temporal gyrus – caudolateral of BA20                     | 2.709   | 0.288  |
| 13   | 58            | Right      | Precentral gyrus – BA4 (upper limb)                       | 2.619   | 0.283  |
| 14   | 144           | Right      | Inferior parietal lobule – rostroventral BA39             | 2.592   | 0.282  |
| 15   | 54            | Right      | Precentral gyrus – BA4 (head and face)                    | 2.558   | 0.280  |
| 16   | 158           | Right      | Postcentral gyrus – BA1/2/3 (tongue and larynx)           | 2.499   | 0.277  |
| 17   | 102           | Right      | Inferior temporal gyrus – caudoventral of BA20            | 2.481   | 0.276  |
| 18   | 60            | Right      | Precentral gyrus – BA4 (trunk region)                     | 2.446   | 0.275  |
| 19   | 156           | Right      | Postcentral gyrus – BA1/2/3 (upper limb, head, and face)  | 2.422   | 0.273  |
| 20   | 56            | Right      | Precentral gyrus – caudal dorsolateral BA6                | 2.421   | 0.273  |
| 21   | 181           | Left       | Cingulate cortex – ventral BA23                           | 2.421   | -0.273 |
| 22   | 120           | Right      | Parahippocampal gyrus – area TH (medial PPHC)             | 2.377   | -0.271 |
| 23   | 62            | Right      | Precentral gyrus – BA4 (tongue and larynx)                | 2.292   | 0.266  |
| 24   | 10            | Right      | Superior frontal gyrus – medial BA6                       | 2.076   | 0.254  |
| 25   | 68            | Right      | Paracentral lobule – BA4 (lower limb)                     | 2.058   | 0.253  |
| 26   | 50            | Right      | Orbitofrontal cortex – BA13                               | 2.054   | -0.253 |
| 27   | 110           | Right      | Parahippocampal gyrus – rostral BA35/36                   | 2.033   | -0.252 |
| 28   | 138           | Right      | Inferior parietal lobule – rostradorsal BA39              | 2.004   | 0.250  |
| 29   | 107           | Left       | Fusiform gyrus – lateroventral BA37                       | 1.904   | 0.244  |
| 30   | 114           | Right      | Parahippocampal gyrus – area TL (lateral PPHC)            | 1.886   | -0.243 |
| 31   | 240           | Right      | Thalamus – posterior parietal region                      | 1.843   | -0.241 |
| 32   | 11            | Left       | Superior frontal gyrus – medial BA9                       | 1.771   | -0.236 |
| 33   | 136           | Right      | Inferior parietal lobule – caudal BA39                    | 1.742   | 0.234  |
| 34   | 160           | Right      | Postcentral gyrus – BA2                                   | 1.738   | 0.234  |
| 35   | 64            | Right      | Precentral gyrus – caudal ventrolateral BA6               | 1.709   | 0.232  |
| 36   | 80            | Right      | Superior temporal gyrus – rostral BA22                    | 1.695   | -0.231 |
| 37   | 198           | Right      | Ventromedial parietooccipital sulcus                      | 1.665   | -0.229 |
| 38   | 88            | Right      | Middle temporal gyrus – anterior superior temporal sulcus | 1.661   | -0.229 |

|    |     |       |                                                            |       |        |
|----|-----|-------|------------------------------------------------------------|-------|--------|
| 39 | 162 | Right | Postcentral gyrus – BA1/2/3 (trunk region)                 | 1.558 | 0.222  |
| 40 | 78  | Right | Superior temporal gyrus – lateral BA38                     | 1.553 | -0.222 |
| 41 | 201 | Left  | V5/MT+                                                     | 1.536 | 0.221  |
| 42 | 143 | Left  | Inferior parietal lobule – rostroventral BA39              | 1.533 | 0.221  |
| 43 | 5   | Left  | Superior frontal gyrus – lateral BA9                       | 1.532 | -0.220 |
| 44 | 8   | Right | Superior frontal gyrus – dorsolateral BA6                  | 1.528 | 0.220  |
| 45 | 194 | Right | Medioventral occipital cortex – caudal cuneus gyrus        | 1.507 | -0.219 |
| 46 | 208 | Right | Lateral occipital cortex – medial superior occipital gyrus | 1.497 | -0.218 |
| 47 | 31  | Left  | Inferior frontal gyrus – inferior frontal sulcus           | 1.448 | -0.215 |
| 48 | 127 | Left  | Superior parietal lobule – caudal BA7                      | 1.423 | -0.213 |
| 49 | 212 | Right | Medial amygdala                                            | 1.362 | -0.208 |
| 50 | 166 | Right | Ventral agranular insula                                   | 1.362 | -0.208 |
| 51 | 19  | Left  | Middle frontal gyrus – BA46                                | 1.339 | -0.207 |
| 52 | 21  | Left  | Middle frontal gyrus – ventral BA9/BA46                    | 1.305 | -0.204 |
| 53 | 234 | Right | Thalamus – premotor region                                 | 1.301 | 0.204  |
| 54 | 140 | Right | Inferior parietal lobule – rostrorodorsal BA40             | 1.294 | 0.203  |
| 55 | 192 | Right | Medioventral occipital cortex – rostral cuneus gyrus       | 1.278 | -0.202 |
| 56 | 35  | Left  | Inferior frontal gyrus – rostral BA45                      | 1.254 | -0.200 |
| 57 | 204 | Right | Lateral occipital cortex – occipital polar cortex          | 1.238 | -0.199 |
| 58 | 236 | Right | Thalamus – sensory region                                  | 1.235 | 0.199  |
| 59 | 33  | Left  | Inferior frontal gyrus – caudal BA45                       | 1.220 | -0.198 |
| 60 | 113 | Left  | Parahippocampal gyrus – area TL (lateral PPHC)             | 1.196 | -0.196 |
| 61 | 84  | Right | Middle temporal gyrus – rostral BA21                       | 1.194 | -0.196 |
| 62 | 243 | Left  | Thalamus – caudal temporal region                          | 1.191 | -0.195 |
| 63 | 97  | Left  | Inferior temporal gyrus – ventrolateral BA37               | 1.186 | 0.195  |
| 64 | 233 | Left  | Thalamus – premotor region                                 | 1.150 | 0.192  |

**Table 3: Top regions correlated with percent change in Y-BOCS Total Score following bilateral DBS of globus pallidus internus (N = 24 patients)**

Range of q-values (FDR-corrected p-values): q = 0.139-0.140.

| Rank | Parcel Number | Hemisphere | Parcellation Area                                           | F-score | R      |
|------|---------------|------------|-------------------------------------------------------------|---------|--------|
| 1    | 211           | Left       | Medial amygdala                                             | 9.825   | -0.556 |
| 2    | 215           | Left       | Rostral hippocampus                                         | 8.423   | -0.526 |
| 3    | 181           | Left       | Cingulate cortex – ventral BA23                             | 7.485   | -0.504 |
| 4    | 241           | Left       | Thalamus – occipital region                                 | 7.405   | -0.502 |
| 5    | 217           | Left       | Caudal hippocampus                                          | 6.112   | -0.466 |
| 6    | 115           | Left       | Parahippocampal gyrus – entorhinal cortex                   | 5.114   | -0.434 |
| 7    | 230           | Right      | Dorsolateral putamen                                        | 4.662   | -0.418 |
| 8    | 210           | Right      | Lateral occipital cortex – lateral superior occipital gyrus | 4.122   | -0.397 |
| 9    | 208           | Right      | Lateral occipital cortex – medial superior occipital gyrus  | 4.116   | -0.397 |
| 10   | 119           | Left       | Parahippocampal gyrus – area TH (medial PPHC)               | 3.867   | -0.387 |
| 11   | 74            | Right      | Superior temporal gyrus – TE1.0 and TE1.2                   | 3.796   | -0.384 |
| 12   | 152           | Right      | Precuneus – dorsomedial parietooccipital sulcus             | 3.788   | -0.383 |
| 13   | 200           | Right      | Medioventral occipital cortex – middle occipital gyrus      | 3.770   | -0.383 |
| 14   | 80            | Right      | Superior temporal gyrus – rostral BA22                      | 3.725   | -0.381 |
| 15   | 194           | Right      | Medioventral occipital cortex – caudal cuneus gyrus         | 3.691   | -0.379 |
| 16   | 170           | Right      | Ventral dysgranular and granular insula                     | 3.619   | -0.376 |
| 17   | 203           | Left       | Lateral occipital cortex – occipital polar cortex           | 3.619   | -0.376 |

|    |     |       |                                                             |       |        |
|----|-----|-------|-------------------------------------------------------------|-------|--------|
| 18 | 193 | Left  | Medioventral occipital cortex – caudal cuneus gyrus         | 3.597 | -0.375 |
| 19 | 164 | Right | Hypergranular insula                                        | 3.582 | -0.374 |
| 20 | 204 | Right | Lateral occipital cortex – occipital polar cortex           | 3.543 | -0.372 |
| 21 | 227 | Left  | Dorsal caudate                                              | 3.519 | 0.371  |
| 22 | 198 | Right | Ventromedial parietooccipital sulcus                        | 3.420 | -0.367 |
| 23 | 136 | Right | Superior parietal lobule – caudal BA39                      | 3.295 | -0.361 |
| 24 | 202 | Right | Lateral occipital cortex – V5MT+                            | 3.292 | -0.361 |
| 25 | 76  | Right | Superior temporal gyrus – caudal BA22                       | 3.245 | -0.359 |
| 26 | 112 | Right | Parahippocampal gyrus – caudal BA35/36                      | 3.245 | -0.359 |
| 27 | 239 | Left  | Thalamus – posterior parietal area                          | 3.238 | -0.358 |
| 28 | 237 | Left  | Thalamus – rostral temporal area                            | 3.204 | -0.357 |
| 29 | 197 | Left  | Ventromedial parietooccipital sulcus                        | 3.154 | -0.354 |
| 30 | 117 | Left  | Temporal agranular insular cortex                           | 3.130 | -0.353 |
| 31 | 205 | Left  | Inferior occipital gyrus                                    | 3.125 | -0.353 |
| 32 | 128 | Right | Superior parietal lobule – caudal BA7                       | 3.077 | -0.350 |
| 33 | 78  | Right | Superior temporal gyrus – lateral BA38                      | 2.972 | -0.345 |
| 34 | 88  | Right | Middle temporal gyrus – anterior superior temporal sulcus   | 2.912 | -0.342 |
| 35 | 207 | Left  | Lateral occipital cortex – medial superior occipital gyrus  | 2.900 | -0.341 |
| 36 | 72  | Right | Superior temporal gyrus – BA41/42                           | 2.887 | -0.341 |
| 37 | 124 | Right | Caudoposterior superior temporal sulcus                     | 2.871 | -0.340 |
| 38 | 199 | Left  | Lateral occipital cortex – middle occipital gyrus           | 2.857 | -0.339 |
| 39 | 213 | Left  | Lateral amygdala                                            | 2.827 | -0.337 |
| 40 | 111 | Left  | Parahippocampal gyrus – caudal BA35/36                      | 2.801 | -0.336 |
| 41 | 176 | Right | Cingulate cortex – dorsal BA23                              | 2.750 | -0.333 |
| 42 | 172 | Right | Dorsal granular insula                                      | 2.749 | -0.333 |
| 43 | 167 | Left  | Dorsal agranular insula                                     | 2.702 | 0.331  |
| 44 | 224 | Right | Nucleus accumbens                                           | 2.671 | -0.329 |
| 45 | 110 | Right | Parahippocampal gyrus – rostral BA35/36                     | 2.651 | -0.328 |
| 46 | 118 | Right | Parahippocampal gyrus – area TI (temporal agranular insula) | 2.642 | -0.327 |
| 47 | 138 | Right | Inferior parietal lobule – rostradorsal BA39                | 2.640 | -0.327 |
| 48 | 148 | Right | Precuneus – medial BA7                                      | 2.639 | -0.327 |
| 49 | 185 | Left  | Cingulate cortex – caudal BA24                              | 2.624 | 0.326  |
| 50 | 31  | Left  | Inferior frontal gyrus – inferior frontal sulcus            | 2.593 | 0.325  |
| 51 | 116 | Right | Parahippocampal gyrus – entorhinal cortex                   | 2.579 | -0.324 |
| 52 | 16  | Right | Middle frontal gyrus – dorsal BA9/46                        | 2.564 | 0.323  |
| 53 | 206 | Right | Lateral occipital cortex – inferior occipital gyrus         | 2.559 | -0.323 |
| 54 | 108 | Right | Fusiform gyrus – lateroventral BA37                         | 2.516 | -0.320 |
| 55 | 24  | Right | Middle frontal gyrus – ventrolateral BA8                    | 2.508 | 0.320  |
| 56 | 21  | Left  | Middle frontal gyrus – ventral BA9/46                       | 2.478 | 0.318  |
| 57 | 33  | Left  | Inferior frontal gyrus – caudal BA45                        | 2.474 | 0.318  |
| 58 | 5   | Left  | Superior frontal gyrus – lateral BA9                        | 2.471 | 0.318  |
| 59 | 127 | Left  | Superior parietal lobule – caudal BA7                       | 2.467 | -0.318 |
| 60 | 39  | Left  | Inferior frontal gyrus – ventral BA44                       | 2.460 | 0.317  |
| 61 | 192 | Right | Medioventral occipital cortex – rostral cuneus gyrus        | 2.427 | -0.315 |
| 62 | 146 | Right | Inferior parietal lobule – rostroventral BA40               | 2.414 | -0.314 |
| 63 | 191 | Left  | Medioventral occipital cortex – rostral cuneus gyrus        | 2.374 | -0.312 |
| 64 | 15  | Left  | Middle frontal gyrus – dorsal BA9/46                        | 2.349 | 0.311  |

**Table 4: Top regions correlated with percent change in Y-BOCS Total Score following bilateral DBS of centromedial thalamus (N = 16 patients)**

Across all regions, q-values (FDR-corrected p-values): q = 0.149.

| Rank | Parcel Number | Hemisphere | Parcellation Area                                         | F-score | R      |
|------|---------------|------------|-----------------------------------------------------------|---------|--------|
| 1    | 226           | Right      | Ventromedial putamen                                      | 10.619  | 0.657  |
| 2    | 48            | Right      | Orbitofrontal cortex – medial BA11                        | 8.369   | 0.612  |
| 3    | 220           | Right      | Ventral caudate                                           | 7.700   | 0.596  |
| 4    | 44            | Right      | Orbitofrontal cortex – orbital BA12/47                    | 7.438   | 0.589  |
| 5    | 28            | Right      | Middle frontal gyrus – lateral BA10                       | 7.253   | 0.584  |
| 6    | 46            | Right      | Orbitofrontal cortex – lateral BA11                       | 7.128   | 0.581  |
| 7    | 190           | Right      | Medioventral occipital cortex – caudal lingual gyrus      | 6.472   | 0.562  |
| 8    | 42            | Right      | Orbitofrontal cortex – medial BA14                        | 6.195   | 0.554  |
| 9    | 206           | Right      | Lateral occipital cortex – inferior occipital gyrus       | 5.950   | 0.546  |
| 10   | 14            | Right      | Superior frontal gyrus – Medial BA10                      | 5.534   | 0.532  |
| 11   | 78            | Right      | Superior temporal gyrus – lateral BA38                    | 5.157   | 0.519  |
| 12   | 204           | Right      | Lateral occipital cortex – occipital polar cortex         | 5.029   | 0.514  |
| 13   | 230           | Right      | Dorsolateral putamen                                      | 4.988   | 0.513  |
| 14   | 239           | Left       | Thalamus – posterior parietal region                      | 4.777   | 0.504  |
| 15   | 194           | Right      | Medioventral occipital cortex – caudal cuneus gyrus       | 4.573   | 0.496  |
| 16   | 192           | Right      | Medioventral occipital cortex – rostral cuneus gyrus      | 4.570   | 0.496  |
| 17   | 106           | Right      | Fusiform gyrus – medioventral BA37                        | 4.551   | 0.495  |
| 18   | 153           | Left       | Precuneus – BA31                                          | 4.332   | 0.486  |
| 19   | 232           | Right      | Thalamus – medial prefrontal region                       | 4.213   | 0.481  |
| 20   | 82            | Right      | Middle temporal gyrus – caudal BA21                       | 3.973   | 0.470  |
| 21   | 188           | Right      | Cingulate cortex – subgenual BA32                         | 3.908   | 0.467  |
| 22   | 200           | Right      | Lateral occipital cortex – middle occipital gyrus         | 3.798   | 0.462  |
| 23   | 107           | Left       | Fusiform gyrus – lateroventral BA37                       | 3.764   | -0.460 |
| 24   | 196           | Right      | Medioventral occipital cortex – rostral lingual gyrus     | 3.720   | 0.458  |
| 25   | 198           | Right      | Ventromedial parietooccipital sulcus                      | 3.638   | 0.454  |
| 26   | 88            | Right      | Middle temporal gyrus – anterior superior temporal sulcus | 3.558   | 0.450  |
| 27   | 175           | Left       | Cingulate gyrus – dorsal area 23                          | 3.411   | 0.443  |
| 28   | 160           | Right      | Postcentral gyrus – BA2                                   | 3.375   | -0.441 |
| 29   | 249           | -          | Brainstem                                                 | 3.370   | -0.440 |
| 30   | 183           | Left       | Cingulate cortex – caudodorsal BA24                       | 3.361   | 0.440  |
| 31   | 171           | Left       | Dorsal granular insula                                    | 3.337   | -0.439 |
| 32   | 234           | Left       | Thalamus – premotor area                                  | 3.286   | -0.436 |
| 33   | 7             | Left       | Cerebellum white matter                                   | 3.254   | -0.434 |
| 34   | 52            | Right      | Orbitofrontal cortex – lateral BA12/47                    | 3.243   | 0.434  |
| 35   | 137           | Left       | Inferior parietal lobule – rostradorsal BA39              | 3.215   | -0.432 |
| 36   | 247           | Left       | Cerebellum gray matter                                    | 3.192   | -0.431 |
| 37   | 179           | Left       | Cingulate cortex – pregenual BA32                         | 3.014   | 0.421  |
| 38   | 13            | Left       | Superior frontal gyrus – medial BA10                      | 3.006   | 0.420  |
| 39   | 51            | Left       | Orbitofrontal cortex – lateral BA12/47                    | 2.969   | 0.418  |
| 40   | 251           | Right      | Cerebellum white matter                                   | 2.966   | -0.418 |
| 41   | 91            | Left       | Inferior temporal gyrus – extreme lateroventral BA37      | 2.950   | -0.417 |
| 42   | 177           | Left       | Cingulate cortex – rostroventral BA24                     | 2.917   | 0.415  |
| 43   | 185           | Left       | Cingulate cortex – subgenual BA32                         | 2.905   | 0.415  |
| 44   | 250           | Right      | Cerebellum gray matter                                    | 2.898   | -0.414 |
| 45   | 162           | Right      | Postcentral gyrus – BA1/2/3 (trunk region)                | 2.850   | -0.411 |
| 46   | 222           | Right      | Globus pallidus                                           | 2.849   | -0.411 |
| 47   | 37            | Left       | Inferior frontal gyrus – opercular BA44                   | 2.818   | 0.409  |
| 48   | 54            | Right      | Precentral gyrus – BA4 (head and face region)             | 2.803   | -0.408 |
| 49   | 163           | Left       | Hypergranular insula                                      | 2.770   | -0.406 |

|    |     |       |                                                                 |       |        |
|----|-----|-------|-----------------------------------------------------------------|-------|--------|
| 50 | 255 | -     | Cerebellar vermal lobules VI-VII                                | 2.716 | -0.403 |
| 51 | 143 | Left  | Inferior parietal lobule – rostroventral BA39                   | 2.710 | -0.403 |
| 52 | 35  | Left  | Inferior frontal gyrus – rostral BA45                           | 2.705 | 0.402  |
| 53 | 159 | Left  | Postcentral gyrus – BA2                                         | 2.652 | -0.399 |
| 54 | 254 | -     | Cerebellar vermal lobules I-V                                   | 2.604 | -0.396 |
| 55 | 157 | Left  | Postcentral gyrus – BA1/2/3 (tongue and larynx region)          | 2.551 | -0.393 |
| 56 | 156 | Right | Postcentral gyrus – BA1/2/3 (upper limb, head, and face region) | 2.547 | -0.392 |
| 57 | 180 | Right | Cingulate cortex – pregenual BA32                               | 2.514 | 0.390  |
| 58 | 8   | Right | Superior frontal gyrus – dorsolateral BA6                       | 2.502 | -0.389 |
| 59 | 178 | Right | Cingulate cortex – rostroventral BA24                           | 2.462 | 0.387  |
| 60 | 130 | Right | Superior parietal lobule – lateral BA5                          | 2.409 | -0.383 |
| 61 | 241 | Left  | Thalamus – occipital region                                     | 2.388 | 0.382  |
| 62 | 155 | Left  | Postcentral gyrus – BA1/2/3 (upper limb, head, and face region) | 2.365 | -0.380 |
| 63 | 97  | Left  | Inferior temporal gyrus – ventrolateral BA37                    | 2.346 | -0.379 |
| 64 | 19  | Left  | Middle frontal gyrus – BA4                                      | 2.333 | 0.3780 |
